# Supplementary material for: Vanadium(IV) Complexes with Methyl-Substituted 8-Hydroxyquinolines: Catalytic Potential in the Oxidation of Hydrocarbons and Alcohols with Peroxides and Biological Activity
Source: MDPI journal article supplement (doi:10.3390/molecules26216364), 2021-10-21
Supplement: s1 [file s1]

## Electronic Supplementary Information

Article

# Vanadium Complexes with Methyl-substituted 8-Hydroxyquinolines: Catalytic Potential in the Oxidation of Hydrocarbons and Alcohols with Peroxides and Biological Activity

Joanna Palion-Gazda<sup>1</sup>, André Luz<sup>2,3</sup>, Luis R. Raposo<sup>2,3</sup>, Katarzyna Choroba<sup>1</sup>, Jacek E. Nycz<sup>1</sup>, Alina Bieńko<sup>4</sup>, Agnieszka Lewińska<sup>4</sup>, Karol Erfurt<sup>5</sup>, Pedro V. Baptista<sup>2,3</sup>, Barbara Machura<sup>1,\*</sup>, Alexandra R. Fernandes<sup>2,3,\*</sup>, Lidia S. Shul'pina<sup>6</sup>, Nikolay S. Ikonnikov<sup>6</sup>, Georgiy B. Shul'pin<sup>7,8,\*</sup>

<sup>1</sup>Institute of Chemistry, University of Silesia, Szkolna 9, 40-006 Katowice, Poland. Email: barbara.machura@us.edu.pl

<sup>2</sup>Associate Laboratory i4HB - Institute for Health and Bioeconomy, NOVA School of Science and Technology, NOVA University Lisbon, 2819-516 Caparica, Portugal. Email: ma.fernandes@fct.unl.pt

<sup>3</sup>UCIBIO – Applied Molecular Biosciences Unit, Department of Life Sciences, NOVA School of Science and Technology, NOVA University Lisbon, 2819-516 Caparica, Portugal

<sup>4</sup>Faculty of Chemistry, University of Wrocław, F. Joliot-Curie 14, 50-383 Wrocław, Poland

<sup>5</sup>Department of Chemical Organic Technology and Petrochemistry, Silesian University of Technology, Krzywoustego 4, 44-100 Gliwice, Poland

<sup>6</sup>A.N. Nesmeyanov Institute of Organoelement Compounds, Russian Academy of Sciences, ulitsa Vavilova 28, Moscow 119991, Russia, e-mail: shulpina@ineos.ac.ru

<sup>7</sup>N.N. Semenov Federal Research Center for Chemical Physics, Russian Academy of Sciences, ulitsa Kosygina 4, Moscow 119991, Russia, e-mail: gbsh@mail.ru

<sup>8</sup>Chair of Chemistry and Physics, Plekhanov Russian University of Economics, Stremyanniy pereulok 36, Moscow 117997, Russia

\*Correspondence: barbara.machura@us.edu.pl, ma.fernandes@fct.unl.pt; gbsh@mail.ru

### Table of Contents

| General Characterization                                                                                                                                    |              |
|-------------------------------------------------------------------------------------------------------------------------------------------------------------|--------------|
| IR spectra of complexes 1–3 and free ligands                                                                                                                | Figure S1    |
| HRMS of complexes 1–3                                                                                                                                       | Figure S2    |
| X-ray studies                                                                                                                                               |              |
| Selected bond lengths and angles for 1–3                                                                                                                    | Table S1-S3  |
| Short intra- and intermolecular hydrogen bonds.                                                                                                             | Table S4     |
| Short $\pi\cdots\pi$ interactions.                                                                                                                          | Table S5     |
| X–Y $\cdots$ Cg(J)( $\pi$ -ring) interactions.                                                                                                              | Table S6     |
| Hirshfeld surface and 2D fingerprint plot for 1–3, together with the relative contributions of various intermolecular interactions to the Hirshfeld surface | Figure S3-S5 |
| View of the intermolecular interactions and packing in 1–3.                                                                                                 | Figure S6-S8 |
| The selected structural parameters of five-coordinated vanadium(IV) complexes                                                                               | Table S7     |
| X-ray powder diffraction patterns of 3                                                                                                                      | Figure S9    |
| EPR spectra                                                                                                                                                 |              |
| EPR frozen solution spectra (at 77 K) of compounds 1–3; in acetonitrile                                                                                     | Figure S10   |
| Absorption spectroscopy                                                                                                                                     |              |
| UV-Vis spectra of complexes 1–3                                                                                                                             | Figure S11   |
| UV-Vis stability spectra in DMSO of 1–3                                                                                                                     | Figure S12   |
| Catalytic data                                                                                                                                              |              |
| Oxidation of cyclohexane catalyzed by oxido-V/PCA/aq.H <sub>2</sub> O <sub>2</sub> /CH <sub>3</sub> CN systems                                              | Table S8     |
| Biological results                                                                                                                                          |              |
| Antiproliferative effect of complexes 1-3 in normal dermal fibroblasts, after 48 h. evaluated by the MTS method.                                            | Figure S13   |
| Cell viability of HCT116 cells.                                                                                                                             | Figure S14   |

## General Characterization

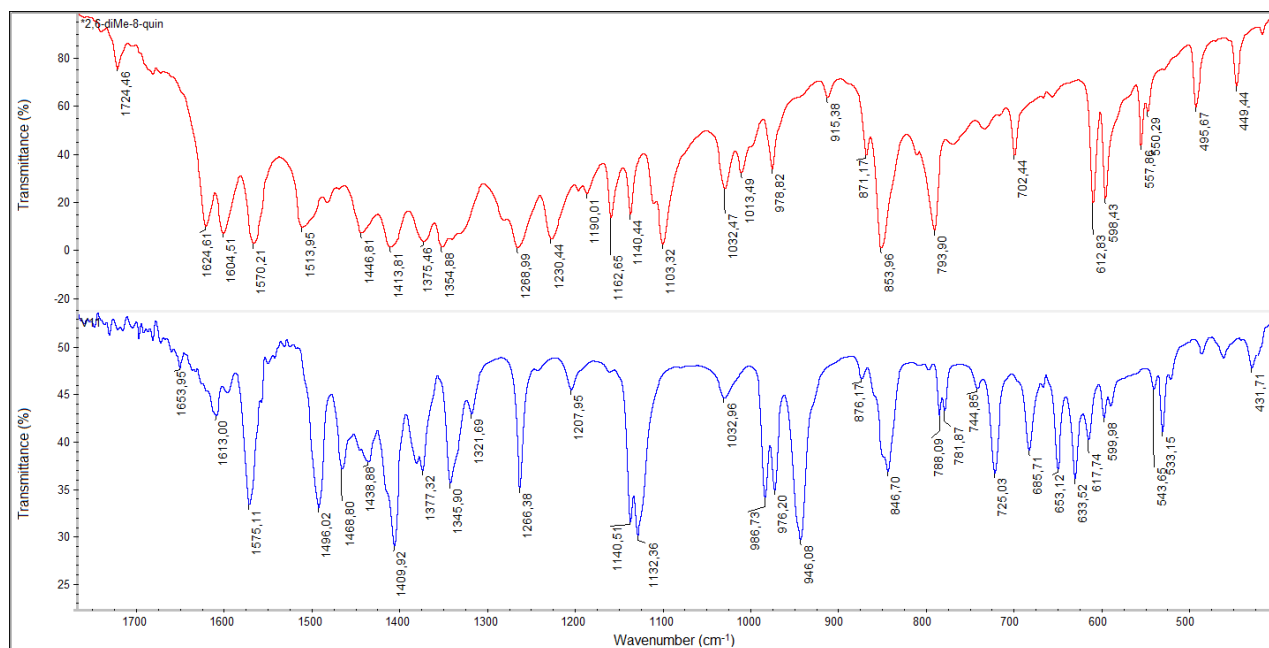

(a)

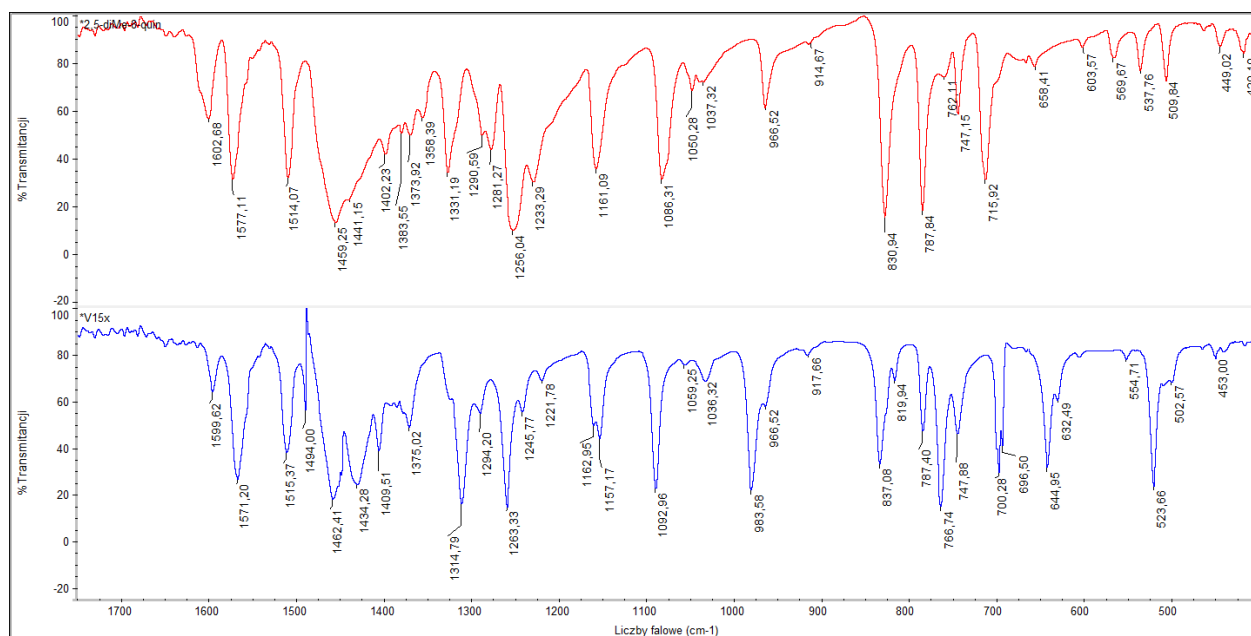

(b)

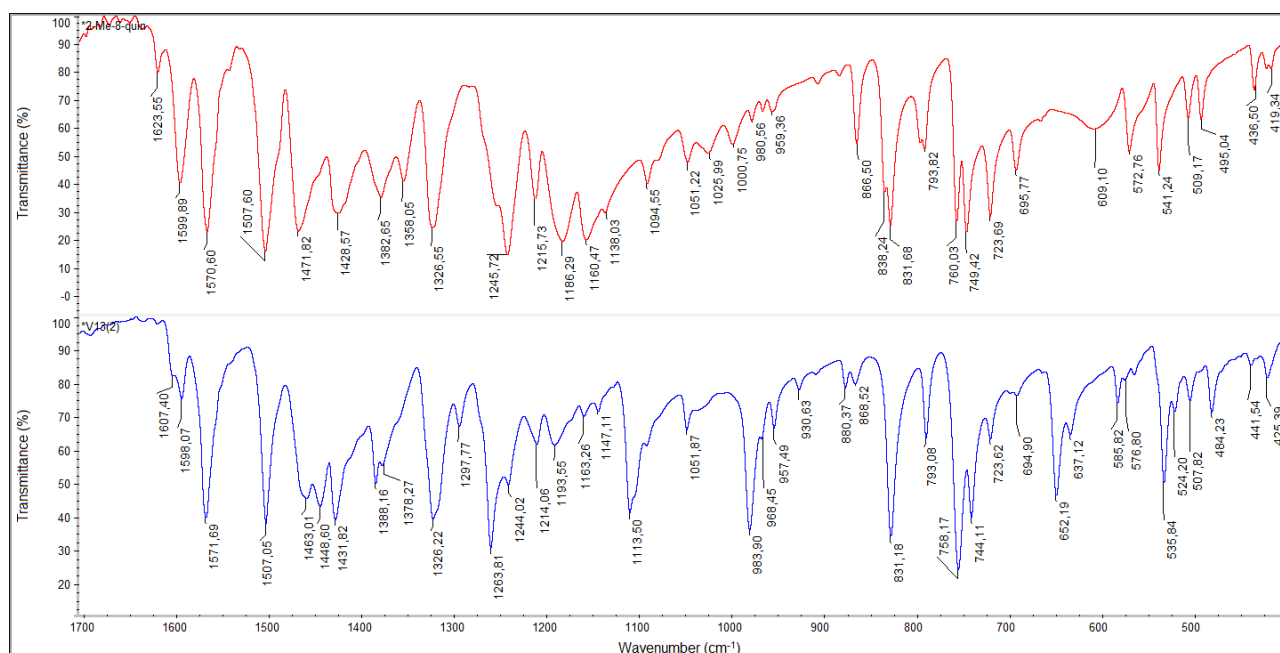

(c)

Figure S1. IR spectra of the complexes 1–3 (blue) and free ligands (red) (a-c).

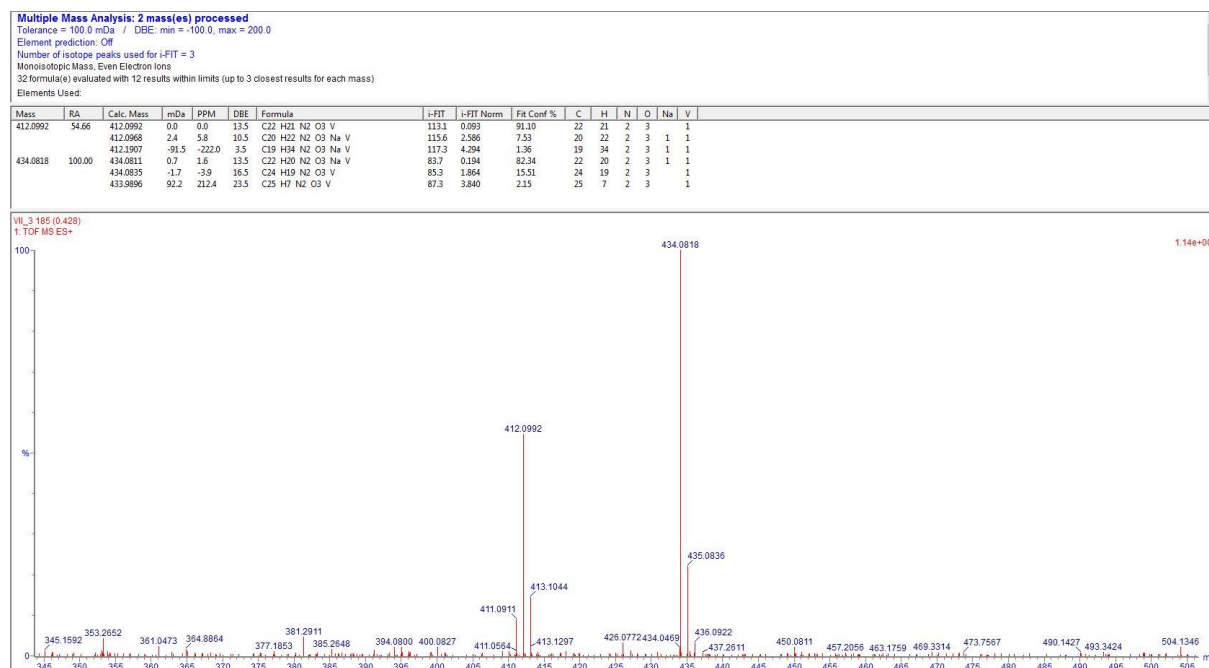

(a)

HRMS (ESI): calcd for  $C_{22}H_{20}N_2O_3NaV^+$   $[M+Na]^+$  434.0811 found 434.0818.

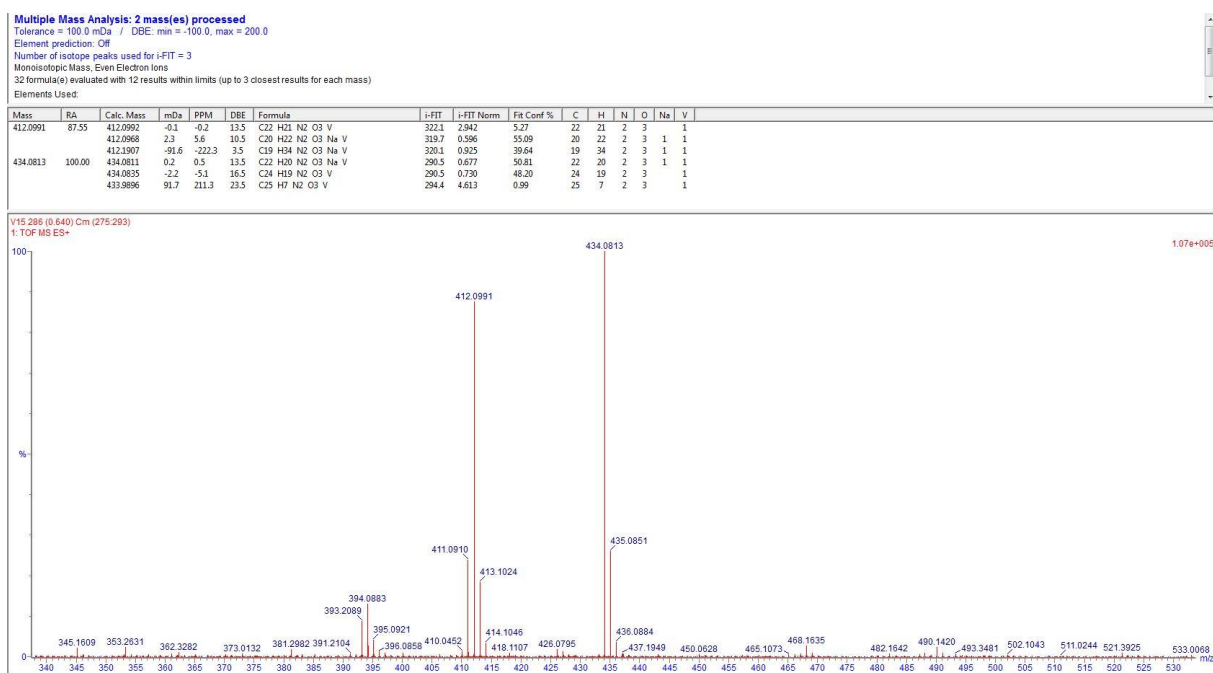

(b)

HRMS (ESI): calcd for  $C_{22}H_{20}N_2O_3NaV^+$   $[M+Na]^+$  434.0811 found 434.0813.

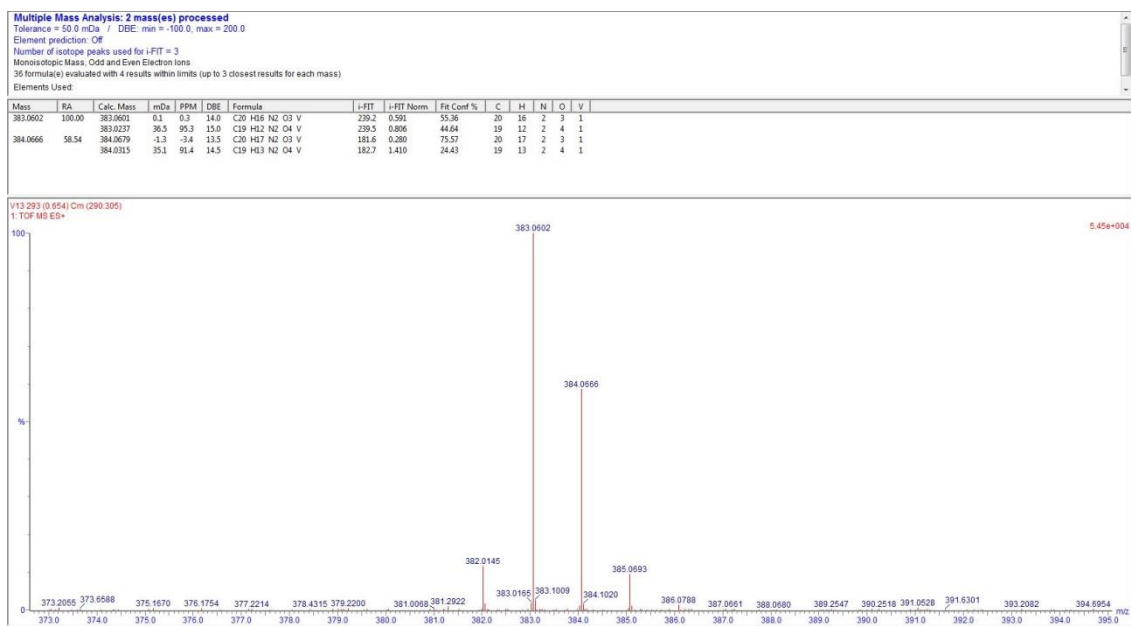

(c)

HRMS (ESI): calcd for  $C_{20}H_{16}N_2O_3V^+$   $[M]^+$  383.0601 found 383.0602.

**Figure S2.** HRMS spectra of the complexes 1–3 (a-c)

# X-Ray studies

**Table S1.** Selected bond lengths (Å) and angles (deg) for **1**.

| Bond lengths |            | Bond angles                  |           |
|--------------|------------|------------------------------|-----------|
| V(1)–O(1)    | 1.9210(14) | O(1) <sup>a</sup> –V(1)–O(1) | 125.26(9) |
| V(1)–O(2)    | 1.590(2)   | O(1)–V(1)–O(2)               | 117.37(5) |
| V(1)–N(1)    | 2.1239(15) | O(1)–V(1)–N(1)               | 80.51(6)  |
|              |            | O(1) <sup>a</sup> –V(1)–N(1) | 89.93(6)  |
|              |            | O(2)–V(1)–N(1)               | 100.40(4) |
|              |            | N(1)–V(1)–N(1) <sup>a</sup>  | 159.19(9) |

<sup>a</sup>Symmetry transformations used to generate equivalent atoms: (a) =  $-x, y, 1/2-z$

**Table S2.** Selected bond lengths (Å) and angles (deg) for **2**.

| Bond lengths |          | Bond angles    |            |
|--------------|----------|----------------|------------|
| V(1)–O(1)    | 1.924(2) | O(1)–V(1)–O(2) | 126.96(11) |
| V(1)–O(2)    | 1.917(2) | O(1)–V(1)–O(3) | 116.84(11) |
| V(1)–O(3)    | 1.595(3) | O(2)–V(1)–O(3) | 116.20(12) |
| V(1)–N(1)    | 2.122(2) | O(1)–V(1)–N(1) | 80.07(9)   |
| V(1)–N(2)    | 2.125(2) | O(2)–V(1)–N(1) | 91.91(9)   |
|              |          | O(3)–V(1)–N(1) | 98.56(11)  |
|              |          | O(1)–V(1)–N(2) | 90.18(9)   |
|              |          | O(2)–V(1)–N(2) | 80.51(10)  |
|              |          | O(3)–V(1)–N(2) | 100.85(11) |
|              |          | N(1)–V(1)–N(2) | 160.56(11) |

**Table S3.** Selected bond lengths (Å) and angles (deg) for **3**.

| Bond lengths |            | Bond angles                  |           |
|--------------|------------|------------------------------|-----------|
| V(1)–O(1)    | 1.9139(13) | O(1) <sup>a</sup> –V(1)–O(1) | 127.03(9) |
| V(1)–O(2)    | 1.588(2)   | O(1)–V(1)–O(2)               | 116.48(5) |
| V(1)–N(1)    | 2.1308(16) | O(1)–V(1)–N(1)               | 80.31(6)  |
|              |            | O(1) <sup>a</sup> –V(1)–N(1) | 91.33(6)  |
|              |            | O(2)–V(1)–N(1)               | 99.36(4)  |
|              |            | N(1)–V(1)–N(1) <sup>a</sup>  | 161.29(9) |

**Table S4.** Short intra- and intermolecular hydrogen bonds.

| D–H•••A                          | D–H [Å] | H•••A [Å] | D–A [Å]   | D–H•••A [°] |
|----------------------------------|---------|-----------|-----------|-------------|
| <b>1</b>                         |         |           |           |             |
| C(10)–H(10A)•••O(1) <sup>a</sup> | 0.96    | 2.56      | 3.237(3)  | 128.0       |
| C(2)–H(2)•••O(2) <sup>b</sup>    | 0.93    | 2.66      | 3.142(3)  | 112.9       |
| <b>2</b>                         |         |           |           |             |
| C(10)–H(10C)•••O(2)              | 0.96    | 2.50      | 3.084(4)  | 119.0       |
| C(21)–H(21C)•••O(1)              | 0.96    | 2.36      | 3.185(5)  | 144.0       |
| C(22)–H(22A)•••O(3) <sup>c</sup> | 0.96    | 2.49      | 3.399(5)  | 158.0       |
| <b>3</b>                         |         |           |           |             |
| C(10)–H(10C)•••O(1)              | 0.96    | 2.33      | 3.503(15) | 145.2       |

Symmetry codes: (a) =  $-x, y, 1/2-z$ ; (b) =  $-x, 1-y, -z$ ; (c) =  $2-x, 1-y, 2-z$ ; (d) =  $1-x, y, 1/2-z$

**Table S5.** Short  $\pi \cdots \pi$  interactions.

| Cg(I)•••Cg(J)              | Cg(I)•••Cg(J) [Å] | $\alpha$ [°] | $\beta$ [°] | $\gamma$ [°] | Cg(I)-Perp [Å] | Cg(J)-Perp [Å] |
|----------------------------|-------------------|--------------|-------------|--------------|----------------|----------------|
| <b>1</b>                   |                   |              |             |              |                |                |
| Cg(1)•••Cg(1) <sup>a</sup> | 3.5193(12)        | 0            | 12.33       | 12.33        | 3.4381(8)      | 3.4381(8)      |
| Cg(1)•••Cg(2) <sup>a</sup> | 3.9845(13)        | 0.42(10)     | 30.38       | 30.36        | 3.4382(8)      | 3.4375(9)      |
| <b>2</b>                   |                   |              |             |              |                |                |
| Cg(1)•••Cg(2) <sup>b</sup> | 3.8928(18)        | 0.94(15)     | 29.2        | 29.1         | 3.4024(13)     | 3.3991(13)     |
| Cg(3)•••Cg(3) <sup>c</sup> | 3.8328(19)        | 0.00(15)     | 6.4         | 6.4          | 3.8091(13)     | 3.8090(13)     |
| Cg(2)•••Cg(2) <sup>b</sup> | 3.7055(19)        | 0.02(15)     | 23.9        | 23.9         | 3.3885(13)     | 3.3885(13)     |
| <b>3</b>                   |                   |              |             |              |                |                |
| Cg(4)•••Cg(4) <sup>b</sup> | 3.6285(12)        | 0            | 10.77       | 10.77        | 3.5645(8)      | 3.5645(8)      |

$\alpha$  = dihedral angle between Cg(I) and Cg(J); Cg(I)-Perp = Perpendicular distance of Cg(I) on ring J; Cg(J)-Perp = perpendicular distance of Cg(J) on ring I;  $\beta$  = angle Cg(I)→Cg(J) vector and normal to ring I;  $\gamma$  = angle Cg(I) →Cg(J) vector and normal to plane J;

Cg1 is the centroid of atoms N(1)/C(1)/C(2)/C(3)/C(4)/C(9); Cg2 is the centroid of atoms C(4)/C(5)/C(6)/C(7)/C(8)/C(9); Cg3 is the centroid of atoms N(2)/C(12)/C(13)/C(14)/C(15)/C(16); Cg4 is the centroid of atoms N(1)/C(1)/C(2)/C(3)/C(4)/C(5);

Symmetry codes: (a) = -x,2-y,-z; (b) = 1-x,1-y,1-z; (c) = 2-x,1-y,2-z

**Table S6.** X–Y•••Cg(J)( $\pi$ -ring) interactions.

| Y-X(I)•••Cg(J)                    | X(I)•••Cg(J) [Å] | X-Perp [Å] | $\gamma$ [°] | Y-X(I)•••Cg(J) [°] |
|-----------------------------------|------------------|------------|--------------|--------------------|
| <b>1</b>                          |                  |            |              |                    |
| C(10)–H(10C)•••Cg(1) <sup>a</sup> | 2.91             | -2.86      | 9.70         | 140.0              |
| <b>2</b>                          |                  |            |              |                    |
| C(10)–H(10B)•••Cg(3) <sup>b</sup> | 2.98             | -2.89      | 14.41        | 136.0              |
| <b>3</b>                          |                  |            |              |                    |
| C(10)–H(10A)•••Cg(3) <sup>c</sup> | 2.78             | -2.73      | 11.42        | 165.0              |

$\gamma$  = angle X(I)→Cg(J) vector and normal to plane J.

Cg1 is the centroid of atoms N(1)/C(1)/C(2)/C(3)/C(4)/C(9); Cg3 is the centroid of atoms N(1)/C(1)/C(2)/C(3)/C(4)/C(5);

Symmetry codes: (a) = -x,1-y,-z; (b) = 1-x,1/2+y,3/2-z; (c) = 1-x,-y,1-z;

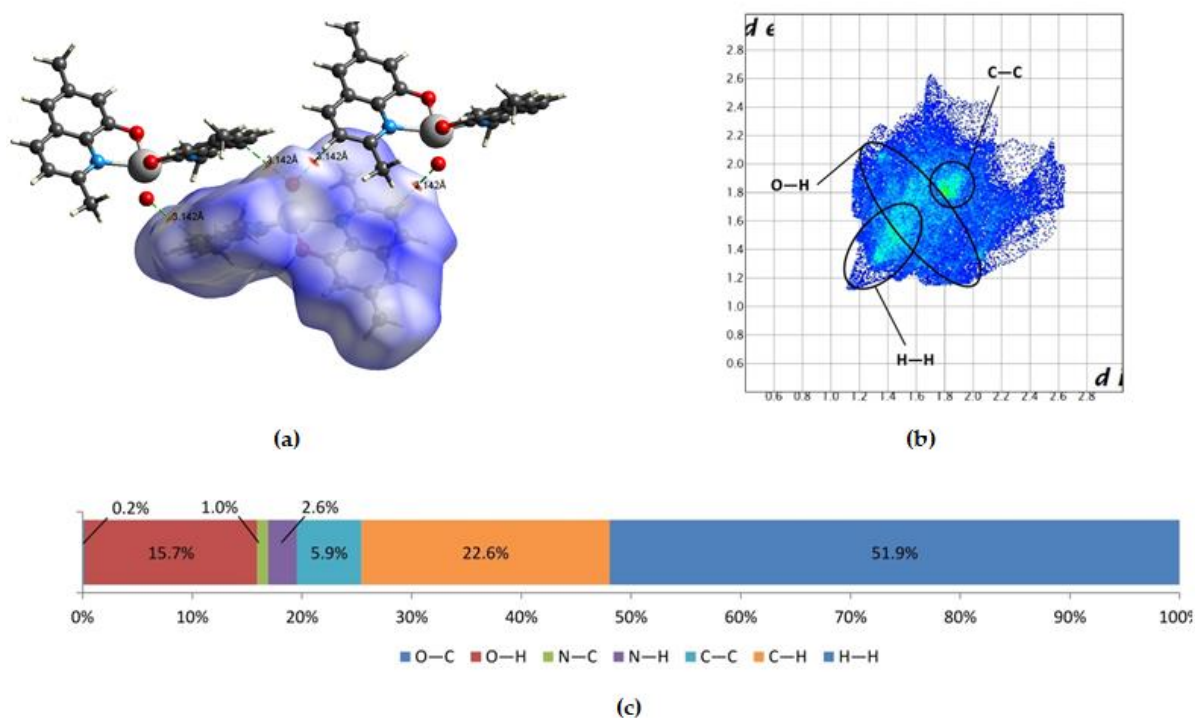

**Figure S3.** Hirshfeld surface mapped with  $d_{\text{norm}}$  along with intermolecular hydrogen bonds (a), and 2D fingerprint plot (b) for **1**, together with the relative contributions of various intermolecular interactions to the Hirshfeld surface (c).

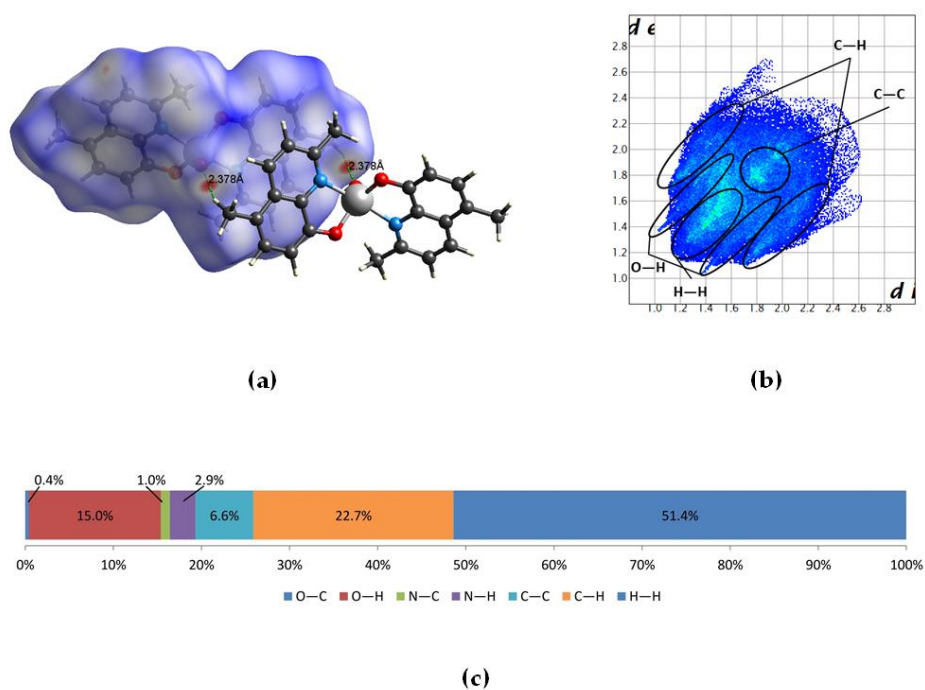

**Figure S4.** Hirshfeld surface mapped with  $d_{\text{norm}}$  along with intermolecular hydrogen bonds (a), and 2D fingerprint plot (b) for **2**, together with the relative contributions of various intermolecular interactions to the Hirshfeld surface (c).

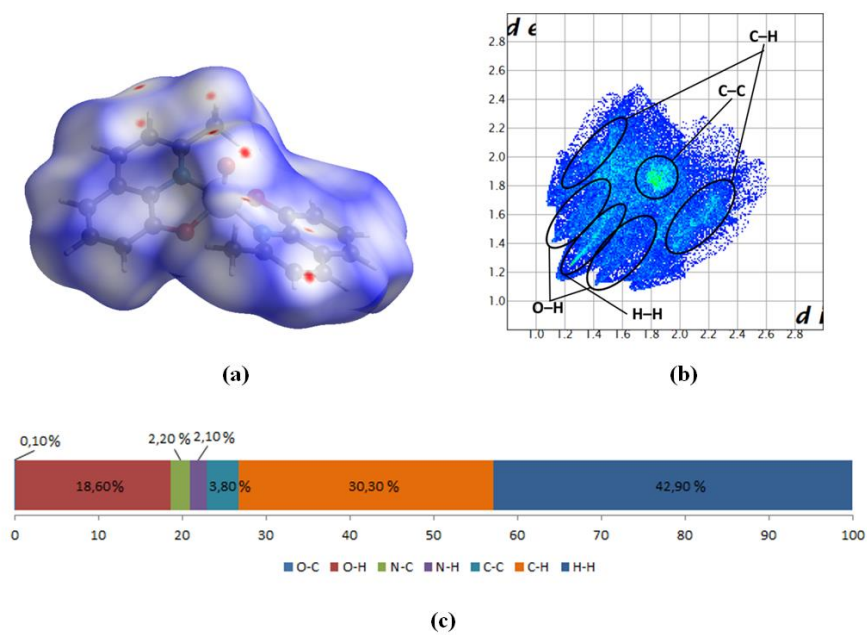

**Figure S5.** Hirshfeld surface mapped with  $d_{\text{norm}}$  along with intermolecular hydrogen bonds (a), and 2D fingerprint plot (b) for 3, together with the relative contributions of various intermolecular interactions to the Hirshfeld surface (c).

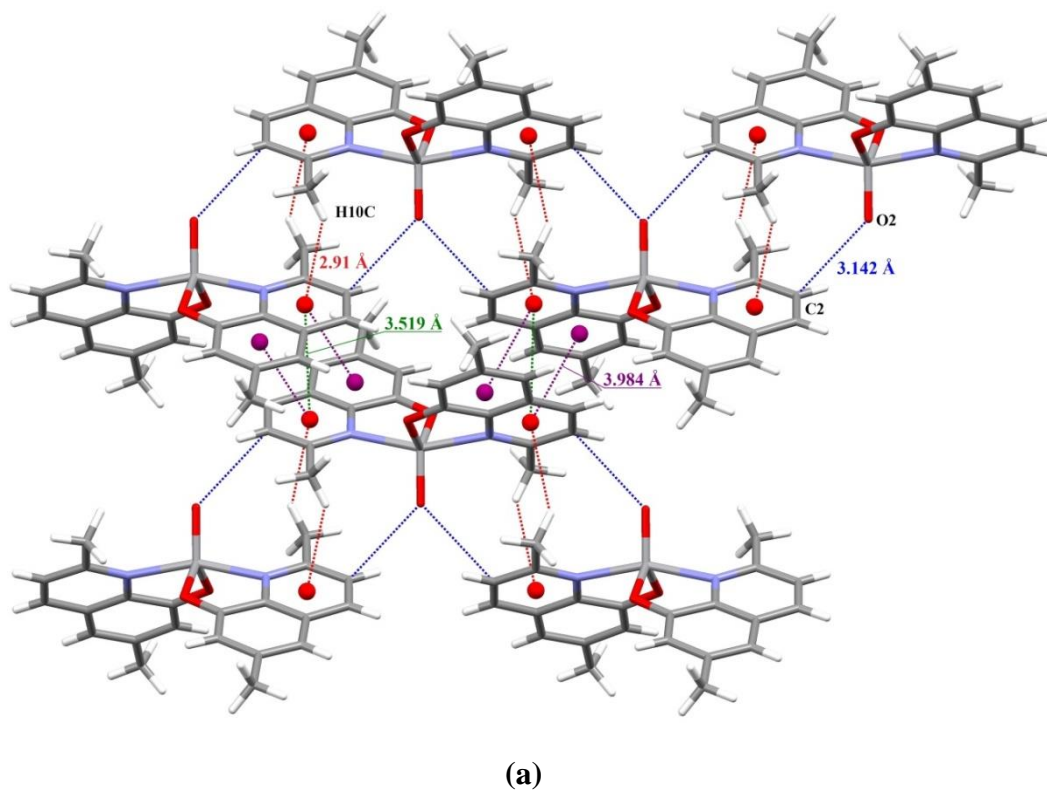



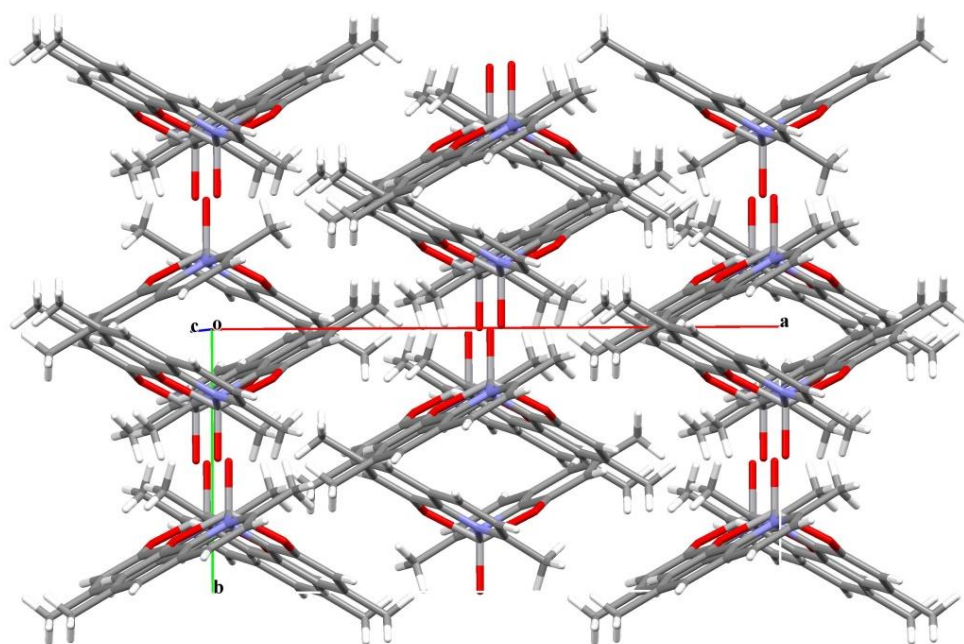

(b)

**Figure S6.** View of the intermolecular interactions ( $\pi\cdots\pi$ , C-H $\cdots\pi$  and C-H $\cdots$ O) in 1 (a), view of the supramolecular packing of 1 alongside c (b).

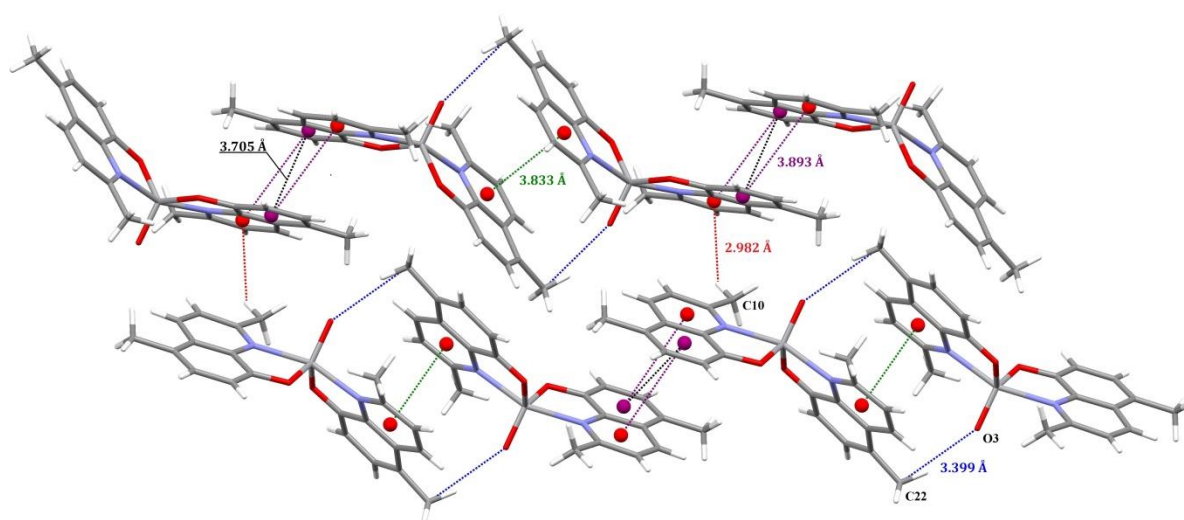

(a)

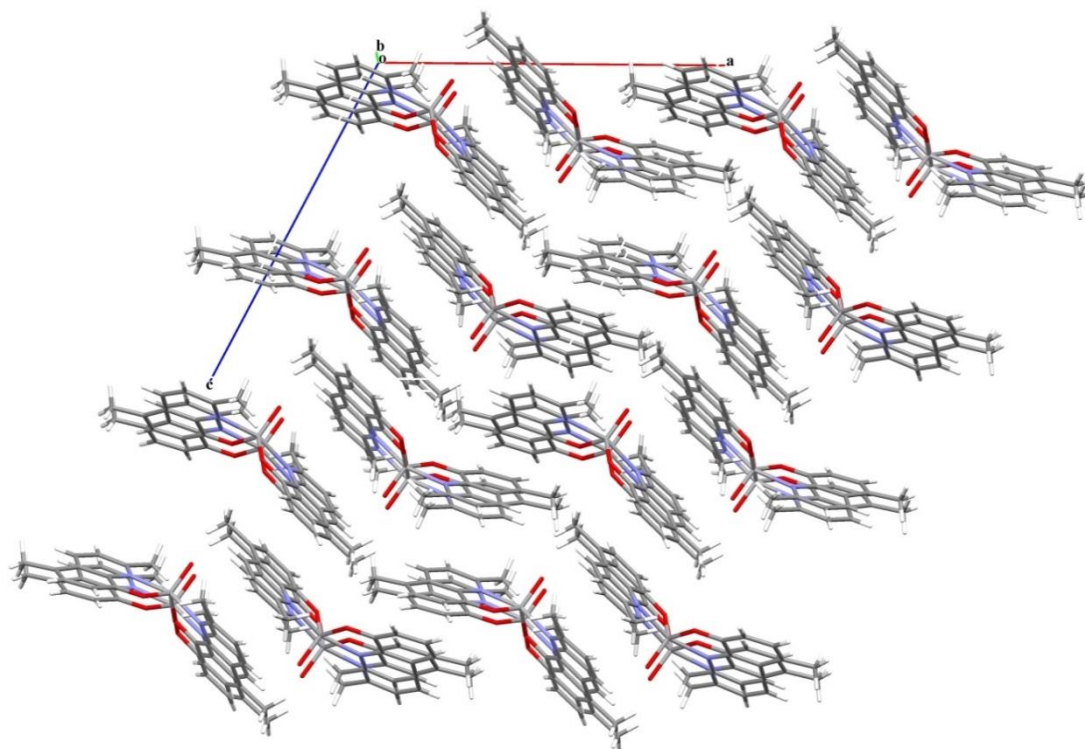

(b)

**Figure S7.** View of the intermolecular interactions ( $\pi\cdots\pi$ ,  $\text{C-H}\cdots\pi$  and  $\text{C-H}\cdots\text{O}$ ) in **2** (a), view of the supramolecular packing of **2** alongside *b* (b).

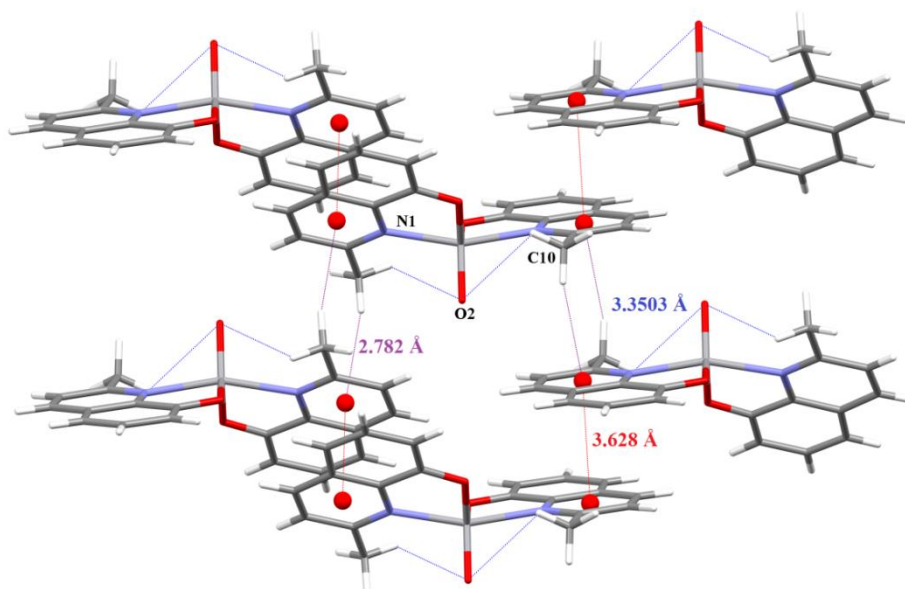

(a)

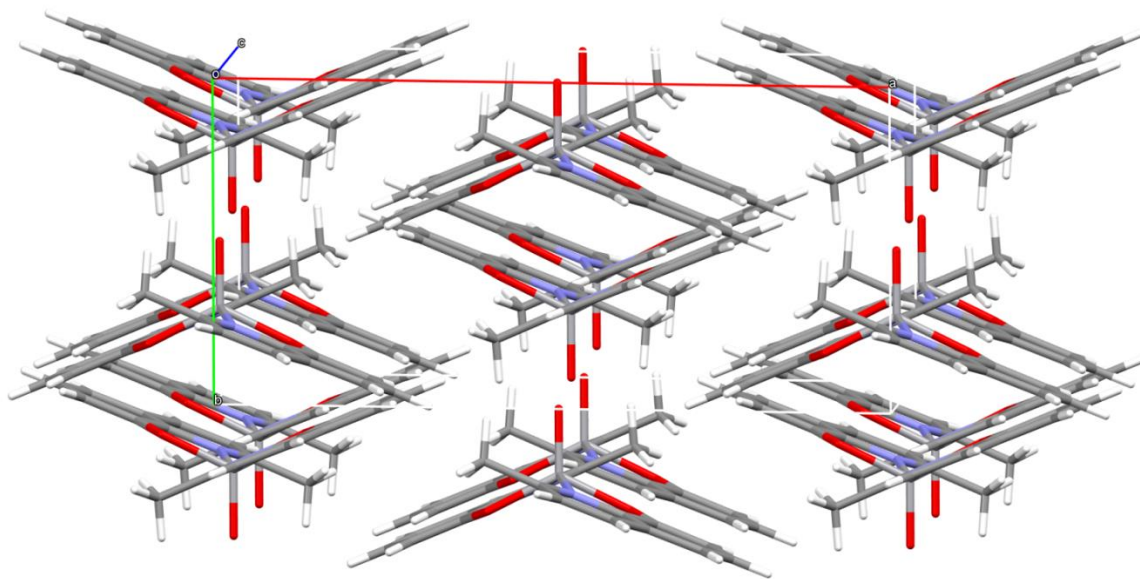

(b)

**Figure S8.** View of the intermolecular interactions ( $\pi\cdots\pi$ ,  $C-H\cdots\pi$  and  $C-H\cdots O$ ) in **3** (a), view of the supramolecular packing of **3** alongside  $c$  (b).

**Table S7.** The selected structural parameters of five-coordinated vanadium(IV) complexes  $[VO(N^{\wedge}O)_2]$  and  $[VO(O^{\wedge}N^{\wedge}N^{\wedge}O)]$ .

| Compound                                      | V=O [Å]    | V–O [Å]                   | V–N [Å]                   | $\tau$ | Ref.      |
|-----------------------------------------------|------------|---------------------------|---------------------------|--------|-----------|
| $[VO(N^{\wedge}O)_2]$                         |            |                           |                           |        |           |
| $[VO(2,6-(Me)_2\text{-quin})_2]$ ( <b>1</b> ) | 1.590(2)   | 1.9210(14)                | 2.1239(15)                | 0.57   | this work |
| $[VO(2,5-(Me)_2\text{-quin})_2]$ ( <b>2</b> ) | 1.595(3)   | 1.924(2); 1.917(2)        | 2.122(2); 2.125(2)        | 0.56   | this work |
| $[VO(2\text{-Me-quin})_2]$                    | 1.600(8)   | 1.921(5)                  | 2.136(6)                  | 0.56   | 1         |
| $[VO(2\text{-Me-5-SMe-quin})_2]$              | 1.576(6)   | 1.934(6); 1.923(6)        | 2.106; 2.122(8)           | 0.50   | 2         |
| $[VO(n\text{-Pr-sal})_2]$                     | 1.5945(18) | 1.9042(16);<br>1.8976(19) | 2.126(2); 2.107(2)        | 0.53   | 3         |
| $[VO(L^1)_2]$                                 | 1.587(4)   | 1.901 (4); 1.914 (3)      | 2.087 (4); 2.088 (4)      | 0.58   | 4         |
| $[VO(2\text{-OC}_6\text{H}_4\text{CHNH})_2]$  | 1.589(4)   | 1.917 (4); 1.919(4)       | 2.056(6); 2.058(6)        | 0.22   | 5         |
| $[VO(L^2)_2]$                                 | 1.5987(16) | 1.9038(16);<br>1.9194(17) | 2.1088(19);<br>2.1095(18) | 0.37   | 6         |
| $[VO(L^3)_2]$                                 | 1.589 (2)  | 1.891(2); 1.904(2)        | 2.110(2); 2.121(2)        | 0.42   | 7         |
| $[VO\{(S)\text{-Clsal-am}\}_2]\cdot C_7H_8$   | 1.592(5)   | 1.912(4); 1.915(4)        | 2.076(6); 2.085(6)        | 0.62   | 8         |
| $[VO\{(S)\text{-naph-am}\}_2]$                | 1.611(2)   | 1.900(3); 1.904(3)        | 2.065(3); 2.085(3)        | 0.75   |           |
| $[VO\{(R)\text{-sal-am}\}_2]\cdot C_7H_8$     | 1.592(2)   | 1.905(2); 1.910(2)        | 2.112(3); 2.100(3)        | 0.44   |           |
| $[VO(L^4)_2]$                                 | 1.590(4)   | 1.893(3)                  | 2.097(3)                  | 0.55   | 9         |
| $[VO(L^5)_2]$                                 | 1.5988(18) | 1.9117(16);<br>1.9149(16) | 2.096(2); 2.098(2)        | 0.58   |           |
| $[VO(L^6)_2]$                                 | 1.601(2)   | 1.9005(17);               | 2.076(2); 2.089(2)        | 0.70   |           |

|                                                                                         |                |                             |                           |      |    |
|-----------------------------------------------------------------------------------------|----------------|-----------------------------|---------------------------|------|----|
|                                                                                         |                | 1.9027(16)                  |                           |      |    |
| [VO(L <sup>7</sup> ) <sub>2</sub> ]                                                     | 1.615(8)       | 1.902(7); 1.900(8)          | 2.153(9); 2.145(9)        | 0.43 | 10 |
| [VO(O <sup>^</sup> N <sup>^</sup> N <sup>^</sup> O)]                                    |                |                             |                           |      |    |
| [VO(3-MeOsalen)]<br>·H <sub>3</sub> N(CH <sub>2</sub> ) <sub>2</sub> NH <sub>2</sub> Cl | 1.5938(18)     | 1.9228(16);<br>1.9287(17)   | 2.047(2); 2.051(2)        | 0.13 | 11 |
| <i>syn</i> -[VO(HL <sup>8</sup> ) <sub>2</sub> ]                                        | 1.596(6)       | 1.914(4)                    | 2.100(4)                  | 0.55 | 12 |
| <i>anti</i> -[VO(HL <sup>8</sup> ) <sub>2</sub> ]                                       | 1.577(4)       | 1.763(3); 1.896(3)          | 2.064(3); 2.189(3)        | 0.06 |    |
| [VO(salen)]·MeOH                                                                        | 1.6070<br>(17) | 1.9155 (17); 1.9429<br>(16) | 2.051 (2); 2.0597<br>(19) | 0.20 | 13 |
| [VOL <sup>9</sup> ]·MeCN                                                                | 1.610(5)       | 1.961(5); 1.972(5)          | 2.091(6); 2.093(6)        | 0.03 | 14 |
| [VOL <sup>10</sup> ]·CHCl <sub>3</sub>                                                  | 1.606(2)       | 1.921(2); 1.922(2)          | 2.060(3); 2.072(3)        | 0.29 | 15 |
| [VOL <sup>11</sup> ]·CHCl <sub>3</sub>                                                  | 1.5913(13)     | 1.9226(12);<br>1.9351(12)   | 2.0589(15);<br>2.0710(15) | 0.26 | 9  |
| [VOL <sup>12</sup> ]                                                                    | 1.581(3)       | 1.937(3); 1.954(3)          | 2.095(3); 2.100(3)        | 0.30 |    |
| [VO(3-EtOsalmeso-stien)]·H <sub>2</sub> O                                               | 1.597(3)       | 1.925(3); 1.934(2)          | 2.065(3); 2.072(3)        | 0.05 | 16 |
| [VO(salmeso-bn)]                                                                        | 1.595(2)       | 1.937(2); 1.948(2)          | 2.061(2); 2.068(2)        | 0.04 | 17 |
| [VO(salen)]ClO <sub>4</sub>                                                             | 1.576(3)       | 1.795(3); 1.813(3)          | 2.074(3); 2.083(3)        | 0.01 | 18 |
| [VO{3-EtOsalm(R)-pn}]                                                                   | 1.598(3)       | 1.918(3); 1.938(3)          | 2.066(4); 2.053(4)        | 0.11 | 19 |
| [VOL <sup>13</sup> ]                                                                    | 1.585(3)       | 1.924(3); 1.938(3)          | 2.050(3); 2.055(3)        | 0.12 | 20 |
| [VO(salen)BF <sub>4</sub> ]                                                             | 1.577(2)       | 1.794(2); 1.814(2)          | 2.067(2); 2.085(2)        | 0.01 | 21 |

|                 |                                                                                     |                               |                                                                                     |                                  |                                                                                       |
|-----------------|-------------------------------------------------------------------------------------|-------------------------------|-------------------------------------------------------------------------------------|----------------------------------|---------------------------------------------------------------------------------------|
| HL <sup>1</sup> | 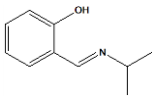 | HL <sup>5</sup>               |  | H <sub>2</sub> L <sup>10</sup>   |  |
| HL <sup>2</sup> |  | HL <sup>6</sup>               |  | H <sub>2</sub> L <sup>11</sup>   |  |
| HL <sup>3</sup> |  | HL <sup>7</sup>               |  | H <sub>2</sub> L <sup>12</sup>   |  |
| (S)-Clsal-am    |  | 3-MeOsalenH <sub>2</sub>      |  | 3-EtOsalmeso-stienH <sub>2</sub> |  |
| (S)-naph-am     |  | H <sub>2</sub> L <sup>8</sup> |  | sal-meso-bnH <sub>2</sub>        |  |
| (R)-sal-am      |  | H <sub>2</sub> salen          |  | 3-EtOsalm(R)-pnH <sub>2</sub>    |  |

|                 |                                                                                   |                               |                                                                                   |                                |                                                                                     |
|-----------------|-----------------------------------------------------------------------------------|-------------------------------|-----------------------------------------------------------------------------------|--------------------------------|-------------------------------------------------------------------------------------|
| HL <sup>4</sup> | 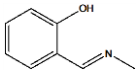 | H <sub>2</sub> L <sup>9</sup> |  | H <sub>2</sub> L <sup>13</sup> |  |
|-----------------|-----------------------------------------------------------------------------------|-------------------------------|-----------------------------------------------------------------------------------|--------------------------------|-------------------------------------------------------------------------------------|

#### References to table:

1. Shiro M.; Fernando, Q. Structures of two five-coordinated metal chelates of 2-methyl-8-quinolinol. *Anal. Chem.* **1971**, 43, 1222–1230.
2. Groom, C. R.; Bruno, I. J.; Lightfoot M. P.; Ward, S. C. The Cambridge structural database. *Acta Cryst.* **2016**, B72, 171–179
3. Elias, H.; Schwartz-Eidam, S.; Wannowius, K. J. Kinetics and mechanism of ligand substitution in bis(*N*-alkylsalicylaldiminato)oxovanadium(IV) complexes. *Inorg. Chem.* **2003**, 42, 2878–2885.
4. Menati, S.; Rudbari, H. A.; Khorshidifard M.; Jalilian, F. A new oxovanadium(IV) complex containing an O,N-bidentate Schiff base ligand: Synthesis at ambient temperature, characterization, crystal structure and catalytic performance in selective oxidation of sulfides to sulfones using H<sub>2</sub>O<sub>2</sub> under solvent-free conditions. *J. Mol. Struct.*, **2016**, 1103, 94–102.
5. Choudhary, N.; Hughes, D. L.; Kleinkes, U.; Larkworthy, L. F.; Leigh, G. J.; Maiwald, M.; Marmion, C. J.; Roger Sanders, J.; Smith G. W.; Sudbrake, C. New tetradentate Schiff bases, their oxovanadium (IV) complexes, and some complexes of bidentate Schiff bases with vanadium (III). *Polyhedron* 1997, **16**, 1517–1528
6. Grivani, G.; Khalaji, A. D.; Tahmasebi, V.; Gotoh K.; Ishida, H. Synthesis, characterization and crystal structures of new bidentate Schiff base ligand and its vanadium(IV) complex: The catalytic activity of vanadyl complex in epoxidation of alkenes. *Polyhedron* **2012**, 31, 265–271.
7. Burgess, J.; Fawcett, J.; Palma V.; Gilani, S. R. Fluoro derivatives of bis(salicylideneaminato-*N*, *O*) copper (II) and-oxovanadium (IV). *Acta Cryst.* **2001**, C57, 277–280.
8. Santoni G.; Rehder, D. Structural models for the reduced form of vanadate-dependent peroxidases: vanadyl complexes with bidentate chiral Schiff base ligands. *J. Inorg. Biochem.* **2004**, 98, 758–764.
9. Cornman, C. R.; Geiser-Bush, K. M.; Rowley, S. P.; Boyle, P. D. Structural and Electron Paramagnetic Resonance Studies of the Square Pyramidal to Trigonal Bipyramidal Distortion of Vanadyl Complexes Containing Sterically Crowded Schiff Base Ligands. *Inorg. Chem.* **1997**, 36, 6401–6408.
10. Pasquali, M.; Marchetti, F.; Floriani C.; Merlino, S. Oxovanadium(IV) complexes containing bidentate Schiff-base ligands: synthesis and structural and spectroscopic data. *J. Chem. Soc., Dalton Trans.* **1977**, 139–144.
11. Cashin, B.; Cunningham, D.; Daly, P.; McArdle, P.; Munroe M.; Chonchubhair, N. N. Donor properties of the vanadyl ion: Reactions of vanadyl salicylaldimine β-ketimine and acetylacetonato complexes with groups 14 and 15 Lewis acids. *Inorg. Chem.* **2002**, 41, 773–782.
12. Bhattacharyya, S.; Mukhopadhyay, S.; Samanta, S.; Weakley, T. J. R.; Chaudhury, M.; Synthesis, characterization, and reactivity of mononuclear O,N-chelated vanadium(IV) and -(III) complexes of methyl 2-aminocyclopent-1-ene-1-dithiocarboxylate based ligand: Reporting an example of conformational isomerism in the solid state. *Inorg. Chem.* **2002**, 41, 2433–2440
13. Hsuan, R. E.; Hughes, J. E.; Miller, T. H.; Shaikh, N.; Cunningham, P. H. M.; O'Connor, A. E.; Tidey J. P.; Blake, A. J. Crystal structure of {2,2'-[ethylenebis(nitrilomethanylylidene)]diphenolato-κ<sup>4</sup>O,N,N',O'}oxidovanadium(IV) methanol monosolvate. *Acta Cryst.* **2014**, E70, m380–m381.
14. Nguyen, M. T.; Jones R. A.; Holliday, B. J. Effect of conjugation length and metal-backbone interactions on charge transport properties of conducting metallopolymer. *Polym. Chem.* **2017**, 8, 4359–4367.
15. Carter, E.; Fallis, I. A.; Kariuki, B. M.; Morgan, I. R.; Murphy D. M.; Tatchell, T.; Van Doorslaer S.; Vinck, E. Structure and pulsed EPR characterization of *N,N'*-bis(5-*tert*-butylsalicylidene)-1,2-cyclohexanediamino-vanadium(IV) oxide and its adducts with propylene oxide. *Dalton Trans.*, **2011**, 40, 7454–7462.



16. Hoshina, G.; Tsuchimoto, M.; Ohba, S.; Nakajima, K.; Uekusa, H.; Ohashi, Y.; Ishida H.; Kojima, M. Thermal dehydrogenation of oxovanadium(IV) complexes with schiff base ligands derived from *meso*-1,2-diphenyl-1,2-ethanediamine in the solid state. *Inorg. Chem.* **1998**, 37, 142–145.
17. Hoshina, G.; Tsuchimoto M.; Ohba, S. *exo*-[(*RS,SR*)-*N,N'*-Bis(salicylidene)-2,3-butanediaminato]oxovanadium(IV) *Acta Cryst.* **1999**, C55, 1082–1084.
18. Bonadies, J. A.; Butler, W. M.; Pecoraro V. L.; Carrano, C. J. Novel reactivity patterns of (N, N'-ethylenebis (salicylideneaminato)) oxovanadium (IV) in strongly acidic media. *Inorg. Chem.* **1987**, 26, 1218–1222.
19. Hoshina, G.; Tsuchimoto M.; Ohba, S. *endo*-{6,6'-Diethoxy-2,2'-[(*R*)-propane-1,2-diylbis(nitrilomethylidene)]diphenolato-*O,N,N',O'*}oxovanadium(IV), *Acta Cryst.* **1999**, C55, 1812–1813.
20. Bolm, C.; Bienewald F.; Harms, K. Syntheses and vanadium complex of salen-like bissulfoximines, *Synlett*, 1996, 8, 775–776.
21. Oyaizu, K.; Dewi, E. L.; Tsuchida, E. Coordination of BF<sub>4</sub><sup>-</sup> to Oxovanadium(V) Complexes, Evidenced by the Redox Potential of Oxovanadium(IV/V) Couples in CH<sub>2</sub>Cl<sub>2</sub>. *Inorg. Chem.* **2003**, 42, 1070–1075.

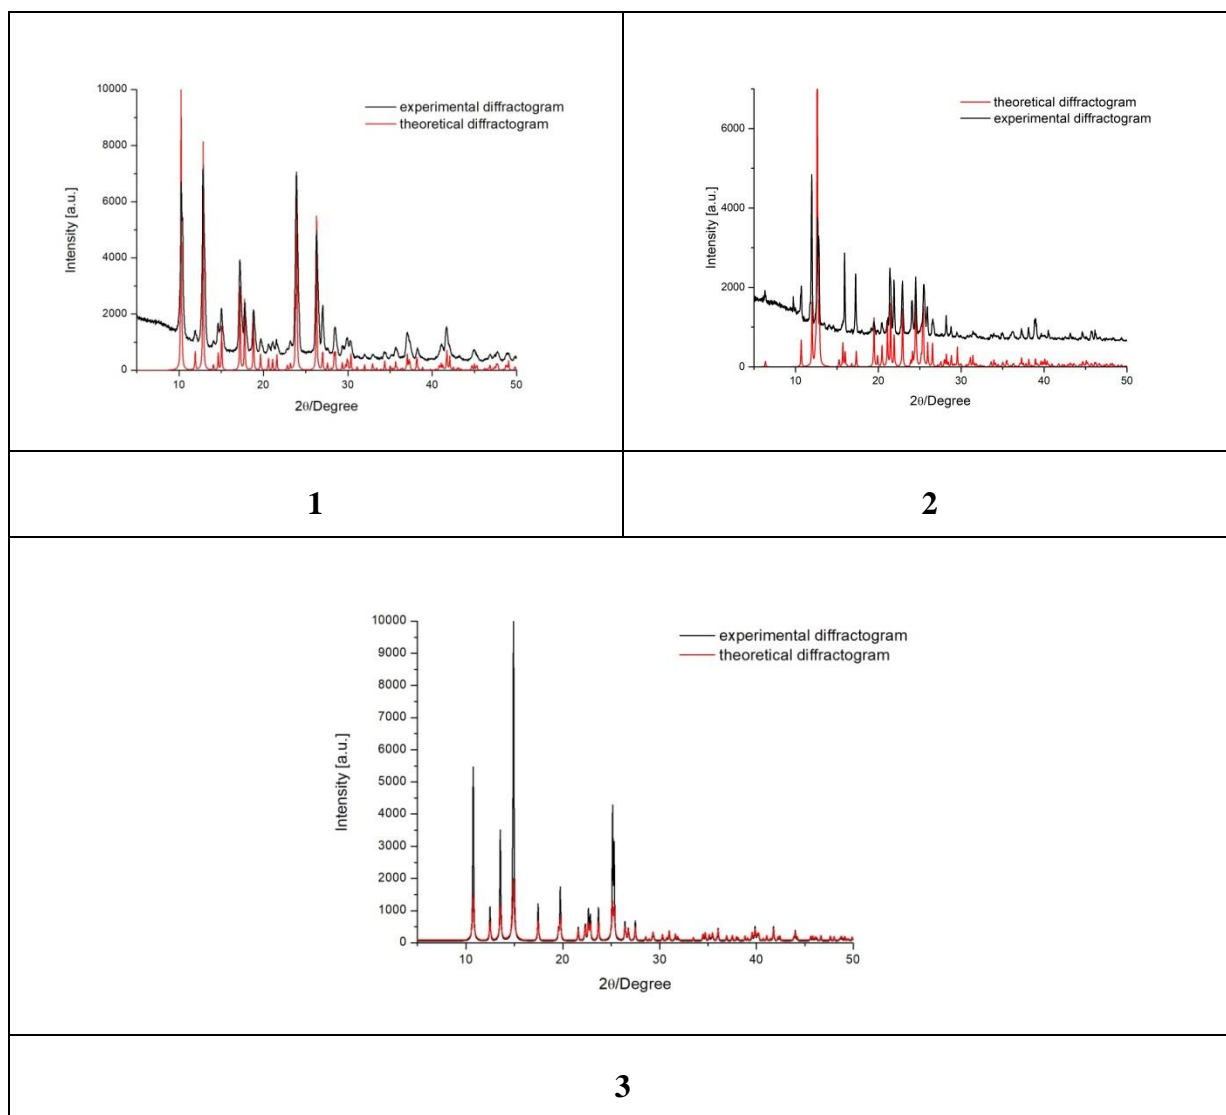

**Figure S9.** X-ray powder diffraction pattern of 1–3 together with the calculated pattern from the single crystal data.

*EPR spectra*

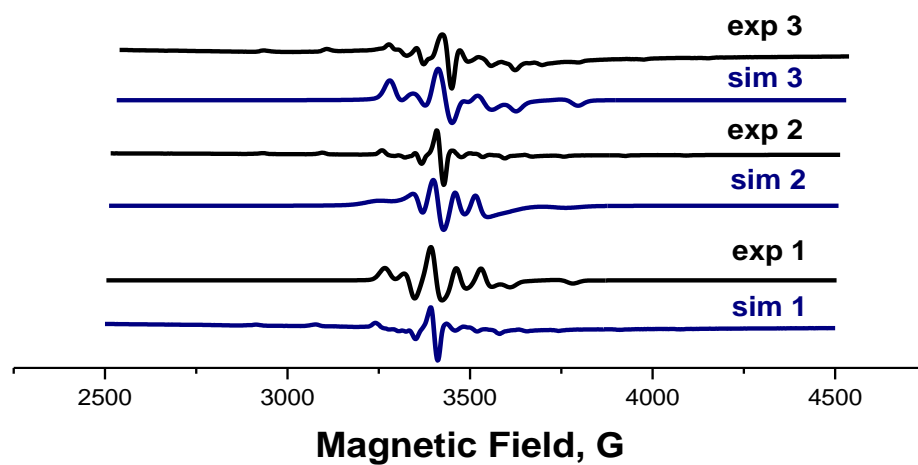

**Figure S10.** EPR frozen solution spectra (at 77 K) of compounds **1–3**; in acetonitrile solvent together with the theoretical spectrum calculated using the parameters:  $g_x = g_y = 1.980$ ,  $g_z = 1.942$ ,  $A_x = A_y = 65$  G,  $A_z = 181$  G for **1** and  $g_x = g_y = 1.979$ ,  $g_z = 1.957$ ,  $A_x = A_y = 53$  G,  $A_z = 169$  G for **2**;  $g_x = g_y = 1.978$ ,  $g_z = 1.959$ ,  $A_x = A_y = 55$  G,  $A_z = 168$  G for **3**

*Absorption spectroscopy*

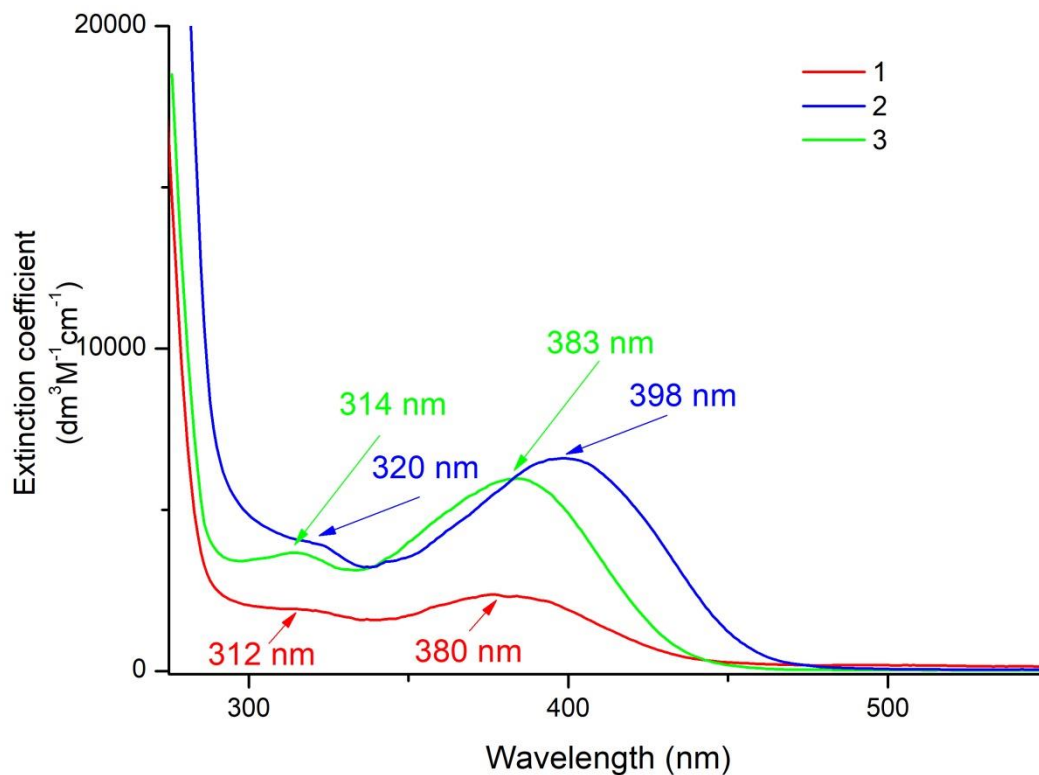

(a)

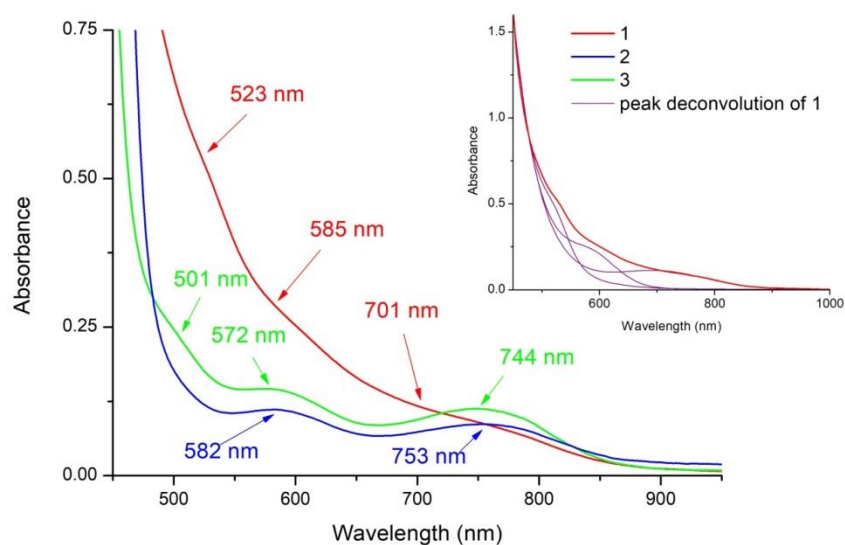

(b)

**Figure S11.** UV-Vis spectra of **1–3** in DMSO full scale ( $5 \cdot 10^{-5}$  M) (a), close-up of the 500–900 nm region (concentrated solutions in DMSO) (b), insert: peak deconvolution of **1** calculated using deconvolution formula implemented in the OriginPro 9.1 software

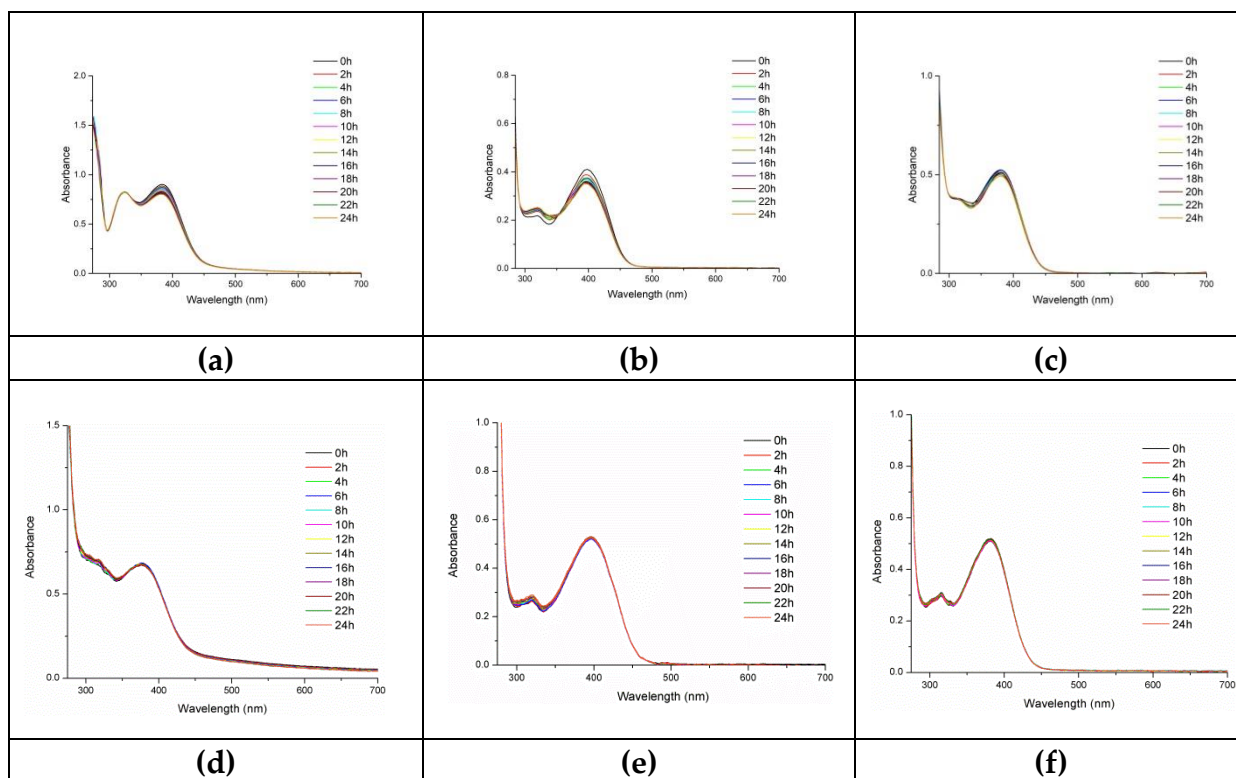

**Figure S12.** UV-Vis stability spectra for compounds **1–3** in DMSO ( $10^{-4}$  M) (a-c) and  $\text{CH}_3\text{CN}$  (d-f). Spectra were recorded every 2 hours for 24h.



*Catalytic data*

**Table S8.** Comparative parameters for the oxidation of cyclohexane catalyzed by complexes 1-3 and other vanadium complexes previously published

| Catalytic system                                                                                                                                                                                                                                                                        | Conditions   | Vanadium oxidation state | Total yield of oxygenates (%) | Total TON | Ref.         |
|-----------------------------------------------------------------------------------------------------------------------------------------------------------------------------------------------------------------------------------------------------------------------------------------|--------------|--------------------------|-------------------------------|-----------|--------------|
| [ <i>n</i> -Bu <sub>4</sub> N][VO <sub>3</sub> ]/pca/H <sub>2</sub> O <sub>2</sub> /CH <sub>3</sub> CN                                                                                                                                                                                  | 40 °C, 4 h   | V                        | 30                            | 700       | 1            |
| [ <i>n</i> -Bu <sub>4</sub> N][VO <sub>2</sub> (pca) <sub>2</sub> ]/H <sub>2</sub> O <sub>2</sub> /CH <sub>3</sub> CN                                                                                                                                                                   | 40 °C, 24 h  | V                        | 4.6                           | 215       | 2            |
| [ <i>n</i> -Bu <sub>4</sub> N][VO <sub>2</sub> (pca) <sub>2</sub> ]/pca/H <sub>2</sub> O <sub>2</sub> /CH <sub>3</sub> CN                                                                                                                                                               | 40 °C, 24 h  | V                        | 20                            | 900       |              |
| [VO(OCH <sub>3</sub> )(ma) <sub>2</sub> ]<br>Hma – 3-hydroxy-2-methyl-4-pyrone                                                                                                                                                                                                          | 40°C, 14 h   | V                        | 27                            | 2600      | 3            |
| [VO(tea)]<br>tea – triethanolamine                                                                                                                                                                                                                                                      | 40 °C, 24 h  | V                        | 10                            | 900       | 4            |
| [VO(OCH <sub>3</sub> )(5-Cl-quin) <sub>2</sub> · 1/2CHCl <sub>3</sub> ]/pca/H <sub>2</sub> O <sub>2</sub> /CH <sub>3</sub> CN<br>5-Cl-quin – 5-chloro-8-hydroxyquinoline                                                                                                                | 40°C, 6 h    | V                        | 39                            | 360       | 5            |
| [{VO(Oet)(EtOH) <sub>2</sub> }] <sub>2</sub> L]/pca/H <sub>2</sub> O <sub>2</sub> /CH <sub>3</sub> CN<br>H <sub>4</sub> L – bis(2-hydroxybenzylidene)terephthalohydrazide                                                                                                               | 50 °C, 24 h  | V                        | 30                            | 700       | 6            |
| [{VO(Oet)(EtOH) <sub>2</sub> }] <sub>2</sub> L]/pca/H <sub>2</sub> O <sub>2</sub> /CH <sub>3</sub> CN<br>H <sub>4</sub> L – bis(2-hydroxybenzylidene)oxalohydrazonic acid                                                                                                               | 50 °C, 4 h   | V                        | 28.7                          | 2640      | 7            |
| [VO <sub>2</sub> (pca)(hmpa)]/pca/H <sub>2</sub> O <sub>2</sub> /CH <sub>3</sub> CN<br>hmpa – hexamethylphosphoramide                                                                                                                                                                   | 40 °C, 24 h  | V                        | 29.8                          | 1370      | 8            |
| [VO <sub>2</sub> (pycaH)(hmpa)]/pca/H <sub>2</sub> O <sub>2</sub> /CH <sub>3</sub> CN<br>hmpa – hexamethylphosphoramide<br>pycaH <sub>2</sub> – pyridine-2,5-dicarboxylic acid                                                                                                          | 40 °C, 24 h  | V                        | 24.8                          | 1140      |              |
| [(VO <sub>2</sub> ) <sub>2</sub> (μ <sub>4</sub> -L)[Na <sub>2</sub> (μ-H <sub>2</sub> O) <sub>2</sub> (H <sub>2</sub> O) <sub>2</sub> ]] <sub>n</sub> /pca/H <sub>2</sub> O <sub>2</sub> /CH <sub>3</sub> CN<br>H <sub>4</sub> L – bis(salicylaldehyde)-oxaloyldihydrazone             | 50 °C, 5 h   | V                        | 4.8                           | 4400      | 9            |
| [{V(μ-O) <sub>2</sub> }] <sub>2</sub> (μ <sub>4</sub> -L)[K <sub>2</sub> (μ-H <sub>2</sub> O) <sub>2</sub> (H <sub>2</sub> O) <sub>2</sub> ]] <sub>n</sub> /pca/H <sub>2</sub> O <sub>2</sub> /CH <sub>3</sub> CN<br>H <sub>4</sub> L – bis(salicylaldehyde)-oxaloyldihydrazone         | 50 °C, 5 h   | V                        | 5.7                           | 5220      |              |
| [{V(μ-O)(μ <sub>3</sub> -O)] <sub>2</sub> (μ <sub>8</sub> -L)[Cs <sub>2</sub> (μ-H <sub>2</sub> O) <sub>2</sub> (H <sub>2</sub> O) <sub>2</sub> ]] <sub>n</sub><br>/pca/H <sub>2</sub> O <sub>2</sub> /CH <sub>3</sub> CN<br>H <sub>4</sub> L – bis(salicylaldehyde)-oxaloyldihydrazone | 50 °C, 5 h   | V                        | 6.2                           | 5700      |              |
| V <sub>3</sub> O <sub>5</sub> (Oet)(ashz) <sub>2</sub> (μ-Oet)] <sub>2</sub> /pca/H <sub>2</sub> O <sub>2</sub> /CH <sub>3</sub> CN<br>H <sub>3</sub> ashz – N-acetylsalicylhydrazide                                                                                                   | 50 °C, 5 h   | mixed<br>IV/V            | 18.2                          | 8370      | 10           |
| [(VO) <sub>4</sub> (hptb) <sub>2</sub> (H <sub>2</sub> O) <sub>2</sub> (μ-O)][ClO <sub>4</sub> ]/pca/H <sub>2</sub> O <sub>2</sub> /CH <sub>3</sub> CN<br>hptbH – N,N,N',N'-tetrakis(2-benzimidazolylmethyl)-2-hydroxy-1,3-diaminopropane                                               | 40 °C, 24 h  | IV                       | 12.4                          | 570       | 8            |
| [VOCl <sub>2</sub> (tmtacn)]/pca/H <sub>2</sub> O <sub>2</sub> /CH <sub>3</sub> CN<br>tmtacn – 1,4,7-trimethyl-1,4,7-triazacyclononane                                                                                                                                                  | 40 °C, 24 h  | IV                       | 6.3                           | 290       |              |
| [V(cat) <sub>3</sub> ]/pca/H <sub>2</sub> O <sub>2</sub> /CH <sub>3</sub> CN<br>catH <sub>2</sub> – pyro-cathecol                                                                                                                                                                       | 40 °C, 24 h  | IV                       | 21.3                          | 980       |              |
| [VOCl <sub>2</sub> (dpp-bian)]/pca/H <sub>2</sub> O <sub>2</sub> / CH <sub>3</sub> CN<br>dpp-bian – bis(N-(2,6-diisopropylphenyl)-imino)acenaphthene                                                                                                                                    | 50 °C, 5 h   | IV                       | 21.5                          | 990       | 11           |
| VO(acac) <sub>2</sub> /H <sub>2</sub> O <sub>2</sub> / CH <sub>3</sub> CN                                                                                                                                                                                                               | 40°C, 5 h    | IV                       | 1.2                           | 23        | 12,13        |
| 1/pca/ H <sub>2</sub> O <sub>2</sub> /CH <sub>3</sub> CN                                                                                                                                                                                                                                | 50 °C, 3 h   | IV                       | 30                            | 565       | this<br>work |
| 2/pca/ H <sub>2</sub> O <sub>2</sub> /CH <sub>3</sub> CN                                                                                                                                                                                                                                | 50 °C, 2 h   | IV                       | 43                            | 870       |              |
| 3/pca/ H <sub>2</sub> O <sub>2</sub> /CH <sub>3</sub> CN                                                                                                                                                                                                                                | 50 °C, 1.5 h | IV                       | 48                            | 954       |              |

## References to table:

1. Shul'pin, G. B.; Attanasio, D.; Suber, L. Efficient  $\text{H}_2\text{O}_2$  oxidation of alkanes and arenes to alkyl peroxides and phenols catalyzed by the system vanadate–pyrazine-2-carboxylic acid. *J. Catal.* **1993**, 142, 147–152.
2. Süss-Fink, G.; Stanislas, S.; Shul'pin, G. B.; Nizova, G. V.; Stoeckli-Evans, H.; Neels, A.; Bobillier, C.; Claude, S.; Oxidative functionalisation of alkanes: synthesis, molecular structure and catalytic implications of anionic vanadium(V) oxo and peroxo complexes containing bidentate N,O ligands. *J. Chem. Soc., Dalton Trans.* **1999**, 3169–3175.
3. Shul'pin, G. B.; Mishra, G. S.; Shul'pina, L. S.; Strelkova, T. V.; Pombeiro, A. J. L. Oxidation of hydrocarbons with hydrogen peroxide catalyzed by maltolato vanadium complexes covalently bonded to silica gel. *Catal. Commun.* **2007**, 8, 1516–1520.
4. Kirillova, V.; Kuznetsov, M. L.; Romakh, V. B.; Shul'pina, L. S.; Fraústo da Silva, J. J. R.; Pombeiro, A. J. L.; Shul'pin, G. B. Mechanism of oxidations with  $\text{H}_2\text{O}_2$  catalyzed by vanadate anion or oxovanadium(V) triethanolamine (vanadatane) in combination with pyrazine-2-carboxylic acid (PCA): Kinetic and DFT studies. *J. Catal.* **2009**, 267, 140–157.
5. Sutradhar, M.; Shvydkiy, N. V.; da Silva, M. F. C. G.; Kirillova, M. V.; Kozlov, Y. N.; Pombeiro, A. J. L.; Shul'pin, G. B. New binuclear oxovanadium(V) complex as a catalyst in combination with pyrazinecarboxylic acid (PCA) for efficient alkane oxygenation by  $\text{H}_2\text{O}_2$ , *Dalton Trans.*, **2013**, 42, 11791–11803.
6. Sutradhar, M.; Shvydkiy, N. V.; Guedes da Silva, C. F. M.; Kirillova, M. V.; Kozlov, Y. N.; Pombeiro, A. J. L.; Shul'pin, G. B. A new binuclear oxovanadium(v) complex as a catalyst in combination with pyrazinecarboxylic acid (PCA) for efficient alkane oxygenation by  $\text{H}_2\text{O}_2$ . *Dalton Trans.*, **2013**, 42, 11791–11803.
7. Gupta, S.; Kirillova, M. V.; Guedes da Silva, M. F.; Pombeiro, A. J. L., Highly efficient divanadium(V) pre-catalyst for mild oxidation of liquid and gaseous alkanes. *Appl. Catal. A-Gen.*, **2013**, 460–461, 82–89.
8. Süss-Fink, G.; Gonzalez Cuervo, L.; Therrien, B.; Stoeckli-Evans, H.; Shul'pin, G. B. Mono and oligonuclear vanadium complexes as catalysts for alkane oxidation: synthesis, molecular structure, and catalytic potential. *Inorg. Chim. Acta*, **2004**, 357, 475–484.
9. Gupta, S.; Kirillova, M. V.; Guedes da Silva, M. F. C.; Pombeiro, A. J. L.; Kirillov, A. M. Alkali metal directed of heterometallic  $\text{V}^{\text{v}}/\text{M}$  ( $\text{M} = \text{Na}, \text{K}, \text{Cs}$ ) coordination polymers: structures, topological analysis, and oxidation catalytic properties. *Inorg. Chem.* **2013**, 52, 15, 8601–8611.
10. Sutradhar, M.; Kirillova, M. V.; Guedes da Silva, M. F. C.; Martins, L. M. D. R. S.; Pombeiro, A. J. L. A hexanuclear mixed-valence oxovanadium(IV,V) complex as a highly efficient alkane oxidation catalyst. *Inorg. Chem.* **2012**, 51, 11229–11231.
11. Fomenko, I. S.; Gushchin, A. L.; Shul'pina, L. S.; Ikonnikov, N. S.; Abramov, P. A.; Romashev, N. F.; Poryvaev, A. S.; Sheveleva, A. M.; Bogomyakov, A. S.; Shmelev, N. Y.; Fedin, M. V.; Shul'pin, G. B.; Sokolov, M. N. New oxidovanadium(IV) complex with a BIAN ligand: synthesis, structure, redox properties and catalytic activity. *New J. Chem.*, **2018**, 42, 16200–16210.
12. Pokutsa, A.; Bloniarz, P.; Fliunt, O.; Kubaj, Y.; Zaborovskyi, A.; Paczeński, T. Sustainable oxidation of cyclohexane catalyzed by a  $\text{VO}(\text{acac})_2$ -oxalic acid tandem: the electrochemical motive of the process efficiency. *RSC Adv.* **2020**, 10, 10959–10971.
13. Pokutsa, A.; Kubaj, Y.; Zaborovskyi, A.; Sobkowiak, A.; Muzart, J. Oxalic acid-improved mild cyclohexane oxidation catalyzed by  $\text{VO}(\text{acac})_2$ : non-radical versus radical mechanism. *Reac. Kinet. Mech. Cat.* **2017**, 122, 757–774.

# Biological results

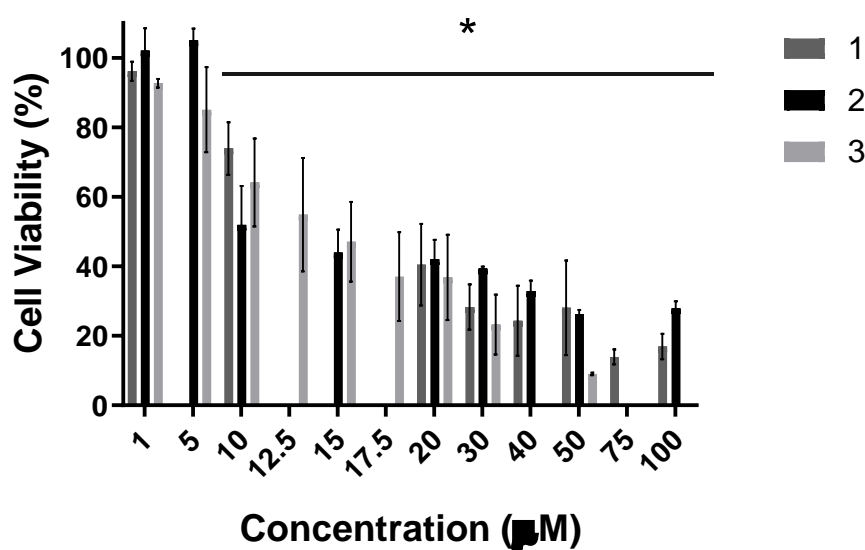

**Figure S13.** Antiproliferative effect of complexes 1-3 in normal dermal fibroblasts, after 48 h. evaluated by the MTS method. Cell viabilities were normalized to DMSO 0.1% (v/v) (vehicle control). The results presented are mean  $\pm$  standard deviation of three independent assays. Asterisk indicates a p-values inferior to 0.05

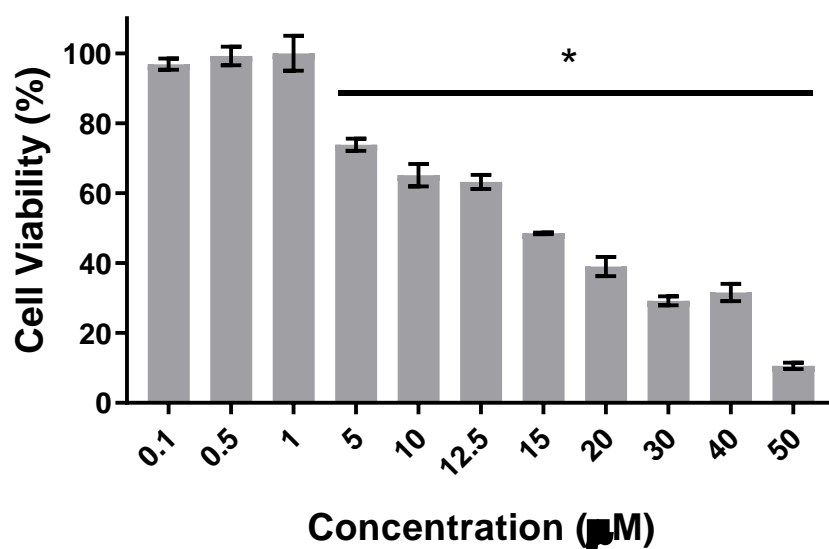

**Figure S14.** Cell viability of HCT116 cells exposed for 48 h to increasing concentrations of cisplatin. IC<sub>50</sub> value found is 15.6  $\pm$  5.3 µM. \* p<0.05 relative to control.
